# Supplementary material for: Association between cerebral tissue oxygen saturation and neurodevelopmental delay in patients undergoing pediatric liver transplantation
Source: Research Square preprint supplement (doi:10.21203/rs.3.rs-3569233/v1), 2023-11-10
Supplement: Supplementary file 1 [file 020593c8a4c9e7b8df3fbcd3.docx]

Table S12 Multivariate logistic analysis result of ICU stay

| Variables | OR | 95% CI | *P* value |
| --- | --- | --- | --- |
| Min SctO2 (%) | 0.973 | 0.910-1.038 | 0.412 |
| Mean SctO2 (%) | 1.209 | 0.861-1.740 | 0.287 |
| Median SctO2 (%) | 0.841 | 0.598-1.156 | 0.297 |
| Age (month) | 0.949 | 0.786-1.127 | 0.561 |
| Weight (kg) | 0.813 | 0.490-1.320 | 0.410 |
| Height (cm) | 1.064 | 0.918-1.247 | 0.428 |
| PELD score | 1.005 | 0.929-1.084 | 0.898 |
| Lac（mmol/L） | 0.955 | 0.563-1.696 | 0.866 |
| TB (µmol/L) | 1.003 | 0.997-1.010 | 0.281 |
| RBC (ml) | 1.006 | 1.001-1.012 | 0.019 |

*P* value < 0.1 was considered significant.

PELD, pediatric end-stage liver disease, Lac, lactic acid, TB, total bilirubin,

RBC, red blood cell, OR, Odds Ratio, CI, Confidence Interval.
