# Supplementary material for: Association between cerebral tissue oxygen saturation and neurodevelopmental delay in patients undergoing pediatric liver transplantation
Source: Research Square preprint supplement (doi:10.21203/rs.3.rs-3569233/v1), 2023-11-10
Supplement: Supplementary file 2 [file 28b41ed10314cb708b99536e.docx]

Table S14 Multivariate logistic analysis result of length of hospital stay

| Variables | OR | 95% CI | *P* value |
| --- | --- | --- | --- |
| Hb (g/L) | 0.970 | 0.935-1.004 | 0.086 |
| PLT (109/L) | 0.997 | 0.992-1.002 | 0.226 |

*P* value < 0.1 was considered significant.

Hb, hemoglobin, PLT, platelet, OR, Odds Ratio, CI, Confidence Interval.
