# Supplementary material for: Association between cerebral tissue oxygen saturation and neurodevelopmental delay in patients undergoing pediatric liver transplantation
Source: Research Square preprint supplement (doi:10.21203/rs.3.rs-3569233/v1), 2023-11-10
Supplement: Supplementary file 3 [file 32315fce56bf9b8fb7d7acaa.docx]

Table S5 Univariate analysis result of developmental delay in fine motor

| Variables | No delay(*n* = 116) | Delay(*n* = 7) | *P* Value |
| --- | --- | --- | --- |
| Intraoperative parameter |  |  |  |
| Max SctO2 (%) | 71.62 (12.76) | 63.07 (10.61) | 0.085 |
| Min SctO2 (%) | 31.20 (12.65) | 26.64 (11.10) | 0.354 |
| Mean SctO2 (%) | 49.73 (12.53) | 45.35 (11.75) | 0.370 |
| Median SctO2 (%) | 49.65 (12.75) | 45.93 (12.26) | 0.454 |
| AUC | 2221.50 [928.75, 4287.75] | 1060.00 [421.00, 3345.75] | 0.247 |
| MAP (mmHg) | 51.52 (5.97) | 48.71 (6.26) | 0.231 |
| pH | 7.30 (0.05) | 7.29 (0.06) | 0.412 |
| Lac (mmol/L) | 3.08 (1.06) | 2.50 (0.43) | 0.153 |
| Cold ischemia time (min) | 66.10 (19.70) | 70.17 (22.84) | 0.625 |
| RBC (ml) | 198.71 (133.97) | 278.57 (162.93) | 0.133 |
| Preoperative parameter |  |  |  |
| Male (%) | 49 (42.2) | 2 ( 28.6) | 0.751 |
| Age (month) | 8.10 (5.58) | 6.29 (2.43) | 0.395 |
| Height (cm) | 67.66 (6.85) | 63.71 (3.35) | 0.134 |
| Weight (kg) | 7.46 (1.83) | 6.53 (1.28) | 0.189 |
| PELD score | 13.26 [7.87, 19.11] | 11.34 [8.15, 14.18] | 0.549 |
| Postoperative parameter |  |  |  |
| Albumin（g/L） | 32.84 (4.18) | 34.73 (4.58) | 0.249 |
| ALT（U/L） | 409.00 [269.00, 620.25] | 392.00 [300.50, 516.00] | 0.752 |
| TB（µmol/L） | 219.40 [105.77, 287.32] | 180.50 [165.95, 249.70] | 0.974 |
| Hb（g/L） | 73.67 (11.21) | 75.57 (11.16) | 0.664 |
| PLT (109/L) | 147.52 (77.48) | 183.00 (85.05) | 0.244 |
| Preoperative developmental delay |  |  |  |
| ASQ score abnormality (%) | 98 (84.5) | 5 ( 71.4) | 0.703 |
| Communication (%) | 56 (48.3) | 3 ( 42.9) | 1.000 |
| Gross motor (%) | 70 (60.3) | 3 ( 42.9) | 0.604 |
| Fine motor (%) | 32 (27.6) | 4 ( 57.1) | 0.214 |
| Problem-solving (%) | 31 (26.7) | 3 ( 42.9) | 0.623 |
| Social skill (%) | 63 (54.3) | 3 ( 42.9) | 0.842 |

The data are presented as the mean (standard deviation), median [interquartile range] and number (percentage).

*P* value < 0.1 was considered significant.

AUC, area under curve, MAP, mean arterial pressure, pH, potential of hydrogen, Lac, lactic acid, RBC, red blood cell, PELD, pediatric end-stage liver disease, ALT, alanine aminotransferase, TB, total bilirubin, Hb, hemoglobin, PLT, platelet, ASQ, ages stages questionnaires.
