# Supplementary material for: Association between cerebral tissue oxygen saturation and neurodevelopmental delay in patients undergoing pediatric liver transplantation
Source: Research Square preprint supplement (doi:10.21203/rs.3.rs-3569233/v1), 2023-11-10
Supplement: Supplementary file 4 [file 7ad69ffd92b74116e7492aa0.docx]

Table S7 Univariate analysis result of developmental delay in problem-solving

| Variables | No delay (*n* = 104) | Delay (*n* = 19) | *P* Value |
| --- | --- | --- | --- |
| Intraoperative parameter |  |  |  |
| Max SctO2 (%) | 72.37 (12.52) | 64.34 (12.28) | 0.011 |
| Min SctO2 (%) | 31.50 (12.73) | 27.84 (11.48) | 0.244 |
| Mean SctO2 (%) | 50.45 (12.43) | 44.16 (11.71) | 0.043 |
| Median SctO2 (%) | 50.39 (12.69) | 44.21 (11.76) | 0.051 |
| AUC | 2261.50 [1030.00, 4390.75] | 1583.50 [529.25, 2597.25] | 0.134 |
| MAP (mmHg) | 51.97 (5.89) | 48.00 (5.56) | 0.007 |
| PH | 7.31 (0.05) | 7.27 (0.04) | 0.012 |
| Lac (mmol/L) | 3.05 (1.02) | 3.03 (1.17) | 0.928 |
| Cold ischemia time (min) | 65.49 (17.19) | 70.94 (31.00) | 0.282 |
| RBC (ml) | 192.98 (135.20) | 259.47 (131.59) | 0.050 |
| Preoperative parameter |  |  |  |
| Male (%) | 45 (43.3) | 6 (31.6) | 0.485 |
| Age (month) | 8.54 (5.75) | 5.05 (1.47) | 0.010 |
| Height (cm) | 68.11 (6.91) | 63.74 (4.38) | 0.009 |
| Weight (kg) | 7.61 (1.87) | 6.29 (0.82) | 0.003 |
| PELD score | 12.55 [6.95, 19.11] | 13.85 [9.90, 17.89] | 0.584 |
| Postoperative parameter |  |  |  |
| Albumin（g/L） | 33.23 (4.14) | 31.41 (4.33) | 0.083 |
| ALT（U/L） | 421.00 [296.25, 677.50] | 325.00 [197.00, 469.00] | 0.025 |
| TB（µmol/L） | 216.35 [97.77, 285.53] | 204.70 [123.55, 292.70] | 0.571 |
| Hb（g/L） | 74.43 (11.25) | 70.21 (10.28) | 0.130 |
| PLT (109/L) | 145.77 (69.06) | 170.21 (115.77) | 0.210 |
| Preoperative developmental delay |  |  |  |
| ASQ score abnormality (%) | 89 (85.6) | 14 ( 73.7) | 0.340 |
| Communication (%) | 48 (46.2) | 11 ( 57.9) | 0.489 |
| Gross motor (%) | 44 (42.3) | 6 ( 31.6) | 0.534 |
| Fine motor (%) | 30 (28.8) | 6 ( 31.6) | 1.000 |
| Problem-solving (%) | 27 (26.0) | 7 ( 36.8) | 0.486 |
| Social skill (%) | 55 (52.9) | 11 ( 57.9) | 0.879 |

The data are presented as the mean (standard deviation), median [interquartile range] and number (percentage).

*P* value < 0.1 was considered significant.

AUC, area under curve, MAP, mean arterial pressure, pH, potential of hydrogen, Lac, lactic acid, RBC, red blood cell, PELD, pediatric end-stage liver disease, ALT, alanine aminotransferase, TB, total bilirubin, Hb, hemoglobin, PLT, platelet, ASQ, ages stages questionnaires.
