# Supplementary material for: Association between cerebral tissue oxygen saturation and neurodevelopmental delay in patients undergoing pediatric liver transplantation
Source: Research Square preprint supplement (doi:10.21203/rs.3.rs-3569233/v1), 2023-11-10
Supplement: Supplementary file 5 [file 7b1854e0d9d74dd4ae1a35c4.docx]

Table S8 Multivariate logistic analysis result of developmental delay in problem-solving

| Variables | OR | 95% CI | *P* value |
| --- | --- | --- | --- |
| Max SctO2 (%) | 0.901 | 0.807-0.981 | 0.034 |
| Mean SctO2 (%) | 1.012 | 0.640-1.642 | 0.958 |
| Median SctO2 (%) | 1.049 | 0.653-1.651 | 0.834 |
| Age (month) | 0.501 | 0.251-0.861 | 0.026 |
| Weight (kg) | 0.523 | 0.190-1.261 | 0.172 |
| Height (cm) | 0.984 | 0.802-1.176 | 0.860 |
| MAP(mmHg) | 0.956 | 0.841-1.081 | 0.472 |
| pH | 0.001 | 0.000-1628.002 | 0.340 |
| Albumin (g/L) | 0.942 | 0.787-1.112 | 0.486 |
| ALT (U/L) | 0.995 | 0.990-0.998 | 0.008 |
| RBC (ml) | 1.000 | 0.994-1.005 | 0.947 |

*P* value < 0.1 was considered significant.

MAP, mean arterial pressure, pH, potential of hydrogen, ALT, alanine aminotransferase,

RBC, red blood cell, OR, Odds Ratio, CI, Confidence Interval.
