# Supplementary material for: Association between cerebral tissue oxygen saturation and neurodevelopmental delay in patients undergoing pediatric liver transplantation
Source: Research Square preprint supplement (doi:10.21203/rs.3.rs-3569233/v1), 2023-11-10
Supplement: Supplementary file 6 [file 8d7f85878d7f65c5515c3a08.docx]

Table S2 Multivariate logistic analysis result of developmental delay in communication skill

| Variables | OR | 95% CI | *P* value |
| --- | --- | --- | --- |
| Max SctO2 (%) | 0.951 | 0.904-0.997 | 0.037 |
| MAP (mmHg) | 0.921 | 0.824-1.021 | 0.127 |
| Albumin (g/L) | 1.183 | 1.010-1.418 | 0.049 |
| PLT (109/L) | 1.005 | 0.998-1.012 | 0.148 |

*P* value < 0.1 was considered significant.

MAP, mean arterial pressure, PLT, platelet, OR, Odds Ratio, CI, Confidence Interval.
