# Supplementary material for: Association between cerebral tissue oxygen saturation and neurodevelopmental delay in patients undergoing pediatric liver transplantation
Source: Research Square preprint supplement (doi:10.21203/rs.3.rs-3569233/v1), 2023-11-10
Supplement: Supplementary file 7 [file 9c98f611c0eef5274f26eaa2.docx]

Table S6 Multivariate logistic analysis result of developmental delay in fine motor

| Variables | OR | 95% CI | *P* value |
| --- | --- | --- | --- |
| Max SctO2 (%) | 0.957 | 0.900-1.016 | 0.148 |

*P* value < 0.1 was considered significant.

OR, Odds Ratio, CI, Confidence Interval.
