# Supplementary material for: Association between cerebral tissue oxygen saturation and neurodevelopmental delay in patients undergoing pediatric liver transplantation
Source: Research Square preprint supplement (doi:10.21203/rs.3.rs-3569233/v1), 2023-11-10
Supplement: Supplementary file 8 [file b90ed8c05b32776589c0ac83.docx]

Table S1 Univariate analysis result of developmental delay in communication skill

| Variables | No delay (*n* = 110) | Delay (*n* = 13) | *P* Value |
| --- | --- | --- | --- |
| Intraoperative parameter |  |  |  |
| Max SctO2 (%) | 71.97 (11.90) | 64.00 (17.58) | 0.033 |
| Min SctO2 (%) | 31.35 (12.58) | 27.42 (12.37) | 0.288 |
| Mean SctO2 (%) | 50.09 (12.19) | 44.26 (14.16) | 0.111 |
| Median SctO2 (%) | 49.97 (12.42) | 44.88 (14.63) | 0.173 |
| AUC | 2243.75 [1062.50, 4336.50] | 1174.50 [429.00, 2264.00] | 0.093 |
| MAP (mmHg) | 51.71 (5.65) | 48.38 (8.06) | 0.058 |
| pH | 7.30 (0.05) | 7.29 (0.05) | 0.458 |
| Lac (mmol/L) | 3.04 (1.01) | 3.13 (1.29) | 0.758 |
| Cold ischemia time (min) | 66.78 (20.08) | 61.45 (16.42) | 0.397 |
| RBC (ml) | 199.09 (133.98) | 238.46 (155.66) | 0.327 |
| Preoperative parameter |  |  |  |
| Male (%) | 45 (40.9) | 6 (46.2) | 0.948 |
| Age (month) | 8.05 (5.48) | 7.54 (5.50) | 0.749 |
| Height (cm) | 67.63 (6.88) | 65.77 (5.53) | 0.350 |
| Weight (kg) | 7.45 (1.85) | 6.97 (1.43) | 0.363 |
| PELD score | 13.26 [8.01, 19.00] | 12.26 [7.85, 18.79] | 0.937 |
| Postoperative parameter |  |  |  |
| Albumin（g/L） | 32.68 (4.21) | 35.15 (3.53) | 0.045 |
| ALT（U/L） | 413.50 [276.50, 622.75] | 343.00 [222.00, 445.00] | 0.126 |
| TB（µmol/L） | 216.35 [107.72, 283.33] | 204.70 [121.20, 295.30] | 0.755 |
| Hb（g/L） | 73.59 (11.26) | 75.38 (10.74) | 0.586 |
| PLT (109/L) | 144.56 (71.41) | 191.68 (115.62) | 0.039 |
| Preoperative developmental delay |  |  |  |
| ASQ score abnormality (%) | 92 (83.6) | 11 (84.6) | 1.000 |
| Communication (%) | 51 (46.4) | 8 (61.5) | 0.458 |
| Gross motor (%) | 63 (57.3) | 10 (76.9) | 0.287 |
| Fine motor (%) | 32 (29.1) | 4 (30.8) | 1.000 |
| Problem-solving (%) | 28 (25.5) | 6 (46.2) | 0.211 |
| Social skill (%) | 57 (51.8) | 9 ( 69.2) | 0.370 |

The data are presented as the mean (standard deviation), median [interquartile range] and number (percentage).

*P* value < 0.1 was considered significant.

AUC, area under curve, MAP, mean arterial pressure, pH, potential of hydrogen, Lac, lactic acid, RBC, red blood cell, PELD, pediatric end-stage liver disease, ALT, alanine aminotransferase, TB, total bilirubin, Hb, hemoglobin, PLT, platelet, ASQ, ages stages questionnaires.

Table S2 Multivariate logistic analysis result of developmental delay in communication skill

| Variables | OR | 95% CI | *P* value |
| --- | --- | --- | --- |
| Max SctO2 (%) | 0.951 | 0.904-0.997 | 0.037 |
| MAP (mmHg) | 0.921 | 0.824-1.021 | 0.127 |
| Albumin (g/L) | 1.183 | 1.010-1.418 | 0.049 |
| PLT (109/L) | 1.005 | 0.998-1.012 | 0.148 |

*P* value < 0.1 was considered significant.

MAP, mean arterial pressure, PLT, platelet, OR, Odds Ratio, CI, Confidence Interval.

Table S3 Univariate analysis result of developmental delay in gross motor

| Variables | No delay (*n* = 89) | Delay (*n* = 34) | *P* Value |
| --- | --- | --- | --- |
| Intraoperative parameter |  |  |  |
| Max SctO2 (%) | 72.50 (12.59) | 67.54 (12.70) | 0.054 |
| Min SctO2 (%) | 31.34 (12.77) | 29.90 (12.16) | 0.572 |
| Mean SctO2 (%) | 50.23 (12.65) | 47.51 (11.99) | 0.282 |
| Median SctO2 (%) | 50.18 (12.81) | 47.49 (12.41) | 0.295 |
| AUC | 2259.00 [833.00, 4520.50] | 2100.75 [1243.62, 3736.62] | 0.680 |
| MAP (mmHg) | 51.81 (5.84) | 50.18 (6.32) | 0.178 |
| PH | 7.31 (0.05) | 7.29 (0.06) | 0.069 |
| Lac (mmol/L) | 2.99 (1.06) | 3.19 (0.97) | 0.332 |
| Cold ischemia time (min) | 66.33 (19.53) | 66.21 (20.73) | 0.977 |
| RBC (ml) | 203.03 (145.46) | 203.82 (110.56) | 0.977 |
| Preoperative parameter |  |  |  |
| Male (%) | 35 (39.3) | 16 (47.1) | 0.566 |
| Age (month) | 8.74 (6.14) | 6.06 (2.10) | 0.014 |
| Height (cm) | 68.43 (7.30) | 64.82 (4.10) | 0.008 |
| Weight (kg) | 7.76 (1.92) | 6.48 (1.01) | <0.001 |
| PELD score | 13.10 [7.10, 19.58] | 12.93 [8.07, 16.66] | 0.977 |
| Postoperative parameter |  |  |  |
| Albumin（g/L） | 32.67 (4.15) | 33.67 (4.31) | 0.236 |
| ALT（U/L） | 426.00 [277.00, 573.00] | 395.00 [253.25, 672.00] | 0.995 |
| TB（µmol/L） | 217.60 [90.80, 290.70] | 208.35 [132.10, 266.30] | 0.819 |
| Hb（g/L） | 74.11 (11.62) | 72.91 (10.03) | 0.596 |
| PLT (109/L) | 141.58 (67.91) | 170.38 (97.82) | 0.067 |
| Preoperative developmental delay |  |  |  |
| ASQ score abnormality (%) | 75 ( 84.3) | 28 (82.4) | 1.000 |
| Communication (%) | 41 ( 46.1) | 18 (52.9) | 0.631 |
| Gross motor (%) | 51 ( 57.3) | 22 (64.7) | 0.588 |
| Fine motor (%) | 29 ( 32.6) | 7 (20.6) | 0.277 |
| Problem-solving (%) | 22 ( 24.7) | 12 (35.3) | 0.343 |
| Social skill (%) | 48 ( 53.9) | 18 (52.9) | 1.000 |

The data are presented as the mean (standard deviation), median [interquartile range] and number (percentage).

*P* value < 0.1 was considered significant.

AUC, area under curve, MAP, mean arterial pressure, pH, potential of hydrogen, Lac, lactic acid, RBC, red blood cell, PELD, pediatric end-stage liver disease, ALT, alanine aminotransferase, TB, total bilirubin, Hb, hemoglobin, PLT, platelet, ASQ, ages stages questionnaires.

Table S4 Multivariate logistic analysis result of developmental delay in gross motor

| Variables | OR | 95% CI | *P* value |
| --- | --- | --- | --- |
| Max SctO2 (%) | 0.980 | 0.940-1.019 | 0.307 |
| Age (month) | 0.961 | 0.753-1.177 | 0.722 |
| Weight (kg) | 2.152 | 0.111-31.647 | 0.588 |
| Height (cm) | 0.781 | 0.441-1.405 | 0.387 |
| pH | 0.001 | 0.000-17.355 | 0.172 |
| PLT (109/L) | 1.006 | 1.000-1.012 | 0.052 |

*P* value < 0.1 was considered significant.

pH, potential of hydrogen, PLT, platelet, OR, Odds Ratio, CI, Confidence Interval

Table S5 Univariate analysis result of developmental delay in fine motor

| Variables | No delay(*n* = 116) | Delay(*n* = 7) | *P* Value |
| --- | --- | --- | --- |
| Intraoperative parameter |  |  |  |
| Max SctO2 (%) | 71.62 (12.76) | 63.07 (10.61) | 0.085 |
| Min SctO2 (%) | 31.20 (12.65) | 26.64 (11.10) | 0.354 |
| Mean SctO2 (%) | 49.73 (12.53) | 45.35 (11.75) | 0.370 |
| Median SctO2 (%) | 49.65 (12.75) | 45.93 (12.26) | 0.454 |
| AUC | 2221.50 [928.75, 4287.75] | 1060.00 [421.00, 3345.75] | 0.247 |
| MAP (mmHg) | 51.52 (5.97) | 48.71 (6.26) | 0.231 |
| pH | 7.30 (0.05) | 7.29 (0.06) | 0.412 |
| Lac (mmol/L) | 3.08 (1.06) | 2.50 (0.43) | 0.153 |
| Cold ischemia time (min) | 66.10 (19.70) | 70.17 (22.84) | 0.625 |
| RBC (ml) | 198.71 (133.97) | 278.57 (162.93) | 0.133 |
| Preoperative parameter |  |  |  |
| Male (%) | 49 (42.2) | 2 ( 28.6) | 0.751 |
| Age (month) | 8.10 (5.58) | 6.29 (2.43) | 0.395 |
| Height (cm) | 67.66 (6.85) | 63.71 (3.35) | 0.134 |
| Weight (kg) | 7.46 (1.83) | 6.53 (1.28) | 0.189 |
| PELD score | 13.26 [7.87, 19.11] | 11.34 [8.15, 14.18] | 0.549 |
| Postoperative parameter |  |  |  |
| Albumin（g/L） | 32.84 (4.18) | 34.73 (4.58) | 0.249 |
| ALT（U/L） | 409.00 [269.00, 620.25] | 392.00 [300.50, 516.00] | 0.752 |
| TB（µmol/L） | 219.40 [105.77, 287.32] | 180.50 [165.95, 249.70] | 0.974 |
| Hb（g/L） | 73.67 (11.21) | 75.57 (11.16) | 0.664 |
| PLT (109/L) | 147.52 (77.48) | 183.00 (85.05) | 0.244 |
| Preoperative developmental delay |  |  |  |
| ASQ score abnormality (%) | 98 (84.5) | 5 ( 71.4) | 0.703 |
| Communication (%) | 56 (48.3) | 3 ( 42.9) | 1.000 |
| Gross motor (%) | 70 (60.3) | 3 ( 42.9) | 0.604 |
| Fine motor (%) | 32 (27.6) | 4 ( 57.1) | 0.214 |
| Problem-solving (%) | 31 (26.7) | 3 ( 42.9) | 0.623 |
| Social skill (%) | 63 (54.3) | 3 ( 42.9) | 0.842 |

The data are presented as the mean (standard deviation), median [interquartile range] and number (percentage).

*P* value < 0.1 was considered significant.

AUC, area under curve, MAP, mean arterial pressure, pH, potential of hydrogen, Lac, lactic acid, RBC, red blood cell, PELD, pediatric end-stage liver disease, ALT, alanine aminotransferase, TB, total bilirubin, Hb, hemoglobin, PLT, platelet, ASQ, ages stages questionnaires.

Table S6 Multivariate logistic analysis result of developmental delay in fine motor

| Variables | OR | 95% CI | *P* value |
| --- | --- | --- | --- |
| Max SctO2 (%) | 0.957 | 0.900-1.016 | 0.148 |

*P* value < 0.1 was considered significant.

OR, Odds Ratio, CI, Confidence Interval.

Table S7 Univariate analysis result of developmental delay in problem-solving

| Variables | No delay (*n* = 104) | Delay (*n* = 19) | *P* Value |
| --- | --- | --- | --- |
| Intraoperative parameter |  |  |  |
| Max SctO2 (%) | 72.37 (12.52) | 64.34 (12.28) | 0.011 |
| Min SctO2 (%) | 31.50 (12.73) | 27.84 (11.48) | 0.244 |
| Mean SctO2 (%) | 50.45 (12.43) | 44.16 (11.71) | 0.043 |
| Median SctO2 (%) | 50.39 (12.69) | 44.21 (11.76) | 0.051 |
| AUC | 2261.50 [1030.00, 4390.75] | 1583.50 [529.25, 2597.25] | 0.134 |
| MAP (mmHg) | 51.97 (5.89) | 48.00 (5.56) | 0.007 |
| PH | 7.31 (0.05) | 7.27 (0.04) | 0.012 |
| Lac (mmol/L) | 3.05 (1.02) | 3.03 (1.17) | 0.928 |
| Cold ischemia time (min) | 65.49 (17.19) | 70.94 (31.00) | 0.282 |
| RBC (ml) | 192.98 (135.20) | 259.47 (131.59) | 0.050 |
| Preoperative parameter |  |  |  |
| Male (%) | 45 (43.3) | 6 (31.6) | 0.485 |
| Age (month) | 8.54 (5.75) | 5.05 (1.47) | 0.010 |
| Height (cm) | 68.11 (6.91) | 63.74 (4.38) | 0.009 |
| Weight (kg) | 7.61 (1.87) | 6.29 (0.82) | 0.003 |
| PELD score | 12.55 [6.95, 19.11] | 13.85 [9.90, 17.89] | 0.584 |
| Postoperative parameter |  |  |  |
| Albumin（g/L） | 33.23 (4.14) | 31.41 (4.33) | 0.083 |
| ALT（U/L） | 421.00 [296.25, 677.50] | 325.00 [197.00, 469.00] | 0.025 |
| TB（µmol/L） | 216.35 [97.77, 285.53] | 204.70 [123.55, 292.70] | 0.571 |
| Hb（g/L） | 74.43 (11.25) | 70.21 (10.28) | 0.130 |
| PLT (109/L) | 145.77 (69.06) | 170.21 (115.77) | 0.210 |
| Preoperative developmental delay |  |  |  |
| ASQ score abnormality (%) | 89 (85.6) | 14 ( 73.7) | 0.340 |
| Communication (%) | 48 (46.2) | 11 ( 57.9) | 0.489 |
| Gross motor (%) | 44 (42.3) | 6 ( 31.6) | 0.534 |
| Fine motor (%) | 30 (28.8) | 6 ( 31.6) | 1.000 |
| Problem-solving (%) | 27 (26.0) | 7 ( 36.8) | 0.486 |
| Social skill (%) | 55 (52.9) | 11 ( 57.9) | 0.879 |

The data are presented as the mean (standard deviation), median [interquartile range] and number (percentage).

*P* value < 0.1 was considered significant.

AUC, area under curve, MAP, mean arterial pressure, pH, potential of hydrogen, Lac, lactic acid, RBC, red blood cell, PELD, pediatric end-stage liver disease, ALT, alanine aminotransferase, TB, total bilirubin, Hb, hemoglobin, PLT, platelet, ASQ, ages stages questionnaires.

Table S8 Multivariate logistic analysis result of developmental delay in problem-solving

| Variables | OR | 95% CI | *P* value |
| --- | --- | --- | --- |
| Max SctO2 (%) | 0.901 | 0.807-0.981 | 0.034 |
| Mean SctO2 (%) | 1.012 | 0.640-1.642 | 0.958 |
| Median SctO2 (%) | 1.049 | 0.653-1.651 | 0.834 |
| Age (month) | 0.501 | 0.251-0.861 | 0.026 |
| Weight (kg) | 0.523 | 0.190-1.261 | 0.172 |
| Height (cm) | 0.984 | 0.802-1.176 | 0.860 |
| MAP(mmHg) | 0.956 | 0.841-1.081 | 0.472 |
| pH | 0.001 | 0.000-1628.002 | 0.340 |
| Albumin (g/L) | 0.942 | 0.787-1.112 | 0.486 |
| ALT (U/L) | 0.995 | 0.990-0.998 | 0.008 |
| RBC (ml) | 1.000 | 0.994-1.005 | 0.947 |

*P* value < 0.1 was considered significant.

MAP, mean arterial pressure, pH, potential of hydrogen, ALT, alanine aminotransferase,

RBC, red blood cell, OR, Odds Ratio, CI, Confidence Interval.

Table S9 Univariate analysis result of developmental delay in social skill

| Variables | No delay (*n* = 118) | Delay (*n* = 5) | *P* Value |
| --- | --- | --- | --- |
| Intraoperative parameter |  |  |  |
| Max SctO2 (%) | 70.77 (12.78) | 79.70 (9.78) | 0.126 |
| Min SctO2 (%) | 30.79 (12.56) | 34.50 (13.58) | 0.520 |
| Mean SctO2 (%) | 49.04 (12.50) | 59.71 (6.67) | 0.061 |
| Median SctO2 (%) | 48.94 (12.69) | 61.00 (6.31) | 0.037 |
| AUC | 2200.25 [970.00, 4298.25] | 546.50 [410.00, 3355.50] | 0.458 |
| MAP (mmHg) | 51.29 (6.10) | 53.00 (2.00) | 0.534 |
| pH | 7.30 (0.05) | 7.33 (0.03) | 0.200 |
| Lac (mmol/L) | 3.08 (1.04) | 2.24 (0.61) | 0.076 |
| Cold ischemia time (min) | 66.38 (19.99) | 64.40 (15.27) | 0.828 |
| RBC (ml) | 200.00 (134.19) | 280.00 (178.89) | 0.200 |
| Preoperative parameter |  |  |  |
| Male (%) | 49 (41.5) | 2 (40.0) | 1.000 |
| Age (month) | 7.89 (5.31) | 10.60 (8.79) | 0.279 |
| Height (cm) | 67.38 (6.79) | 68.60 (6.50) | 0.694 |
| Weight (kg) | 7.42 (1.83) | 6.92 (1.38) | 0.544 |
| PELD score | 13.65 [8.25, 19.00] | 7.85 [4.82, 10.67] | 0.287 |
| Postoperative parameter |  |  |  |
| Albumin（g/L） | 32.91 (4.22) | 33.86 (4.16) | 0.621 |
| ALT（U/L） | 409.00 [276.25, 610.50] | 392.00 [164.00, 460.00] | 0.276 |
| TB（µmol/L） | 219.40 [107.72, 289.58] | 138.00 [121.20, 204.70] | 0.485 |
| Hb（g/L） | 73.75 (11.28) | 74.60 (9.29) | 0.868 |
| PLT (109/L) | 148.19 (76.81) | 181.40 (107.79) | 0.353 |
| Preoperative developmental delay |  |  |  |
| ASQ score abnormality (%) | 99 (83.9) | 4 ( 80.0) | 1.000 |
| Communication (%) | 56 (47.5) | 3 ( 60.0) | 0.926 |
| Gross motor (%) | 69 (58.5) | 4 ( 80.0) | 0.621 |
| Fine motor (%) | 33 (28.0) | 3 ( 60.0) | 0.298 |
| Problem-solving (%) | 33 (28.0) | 1 ( 20.0) | 1.000 |
| Social skill (%) | 62 (52.5) | 4 ( 80.0) | 0.454 |

The data are presented as the mean (standard deviation), median [interquartile range] and number (percentage).

*P* value < 0.1 was considered significant.

AUC, area under curve, MAP, mean arterial pressure, pH, potential of hydrogen, Lac, lactic acid, RBC, red blood cell, PELD, pediatric end-stage liver disease, ALT, alanine aminotransferase, TB, total bilirubin, Hb, hemoglobin, PLT, platelet, ASQ, ages stages questionnaires.

Table S10 Multivariate logistic analysis result of developmental delay in social skill

| Variables | OR | 95% CI | *P* value |
| --- | --- | --- | --- |
| Mean SctO2 (%) | 0.624 | 0.298-1.097 | 0.141 |
| Median SctO2 (%) | 1.744 | 0.984-3.762 | 0.087 |
| Lac (mmol/L) | 0.260 | 0.028-1.192 | 0.145 |

*P* value < 0.1 was considered significant.

Lac, lactic acid, OR, Odds Ratio, CI, Confidence Interval

Table S11 Univariate analysis result of ICU stay

| Variables | Non-extent (*n* = 61) | Extent (*n* = 62) | *P* Value |
| --- | --- | --- | --- |
| Intraoperative parameter |  |  |  |
| Max SctO2 (%) | 72.28 (12.72) | 70.00 (12.81) | 0.324 |
| Min SctO2 (%) | 33.80 (13.20) | 28.13 (11.34) | 0.012 |
| Mean SctO2 (%) | 51.88 (12.84) | 47.11 (11.74) | 0.033 |
| Median SctO2 (%) | 52.01 (12.89) | 46.90 (12.09) | 0.025 |
| AUC | 2660.50 [1060.00, 4612.00] | 1935.75 [778.75, 3760.88] | 0.284 |
| MAP (mmHg) | 51.00 (6.28) | 51.71 (5.74) | 0.514 |
| pH | 7.30 (0.05) | 7.30 (0.05) | 0.516 |
| Lac (mmol/L) | 2.86 (0.85) | 3.23 (1.17) | 0.047 |
| Cold ischemia time (min) | 64.43 (20.02) | 68.13 (19.52） | 0.306 |
| RBC (ml) | 162.62 (116.56) | 243.23 (143.18) | 0.001 |
| Preoperative parameter |  |  |  |
| Male (%) | 24 ( 39.3%) | 27 ( 43.5%) | 0.772 |
| Age (month) | 9.33 (6.59) | 6.69 (3.67) | 0.007 |
| Height (cm) | 68.95 (7.71) | 65.94 (5.31) | 0.013 |
| Weight (kg) | 7.85 (1.91) | 6.96 (1.60) | 0.006 |
| PELD score | 11.64 [0.61, 18.79] | 15.51 [10.67, 19.22] | 0.012 |
| Postoperative parameter |  |  |  |
| Albumin (g/L) | 33.25 (4.37) | 32.64 (4.05) | 0.425 |
| ALT (U/L) | 411.00 [277.00, 539.00] | 403.00 [266.75, 733.25] | 0.771 |
| TB (µmol/L) | 162.70 [67.10, 240.10] | 252.80 [155.38, 307.85] | <0.001 |
| Hb (g/L) | 74.54 (10.64) | 73.03 (11.72） | 0.456 |
| PLT (109/L) | 157.26 (80.01) | 141.95 (75.82） | 0.278 |

The data are presented as the mean (standard deviation), median [interquartile range] and number (percentage).

*P* value < 0.1 was considered significant.

AUC, area under curve, MAP, mean arterial pressure, pH, potential of hydrogen, Lac, lactic acid, RBC, red blood cell, PELD, pediatric end-stage liver disease, ALT, alanine aminotransferase, TB, total bilirubin, Hb, hemoglobin, PLT, platelet.

Table S12 Multivariate logistic analysis result of ICU stay

| Variables | OR | 95% CI | *P* value |
| --- | --- | --- | --- |
| Min SctO2 (%) | 0.973 | 0.910-1.038 | 0.412 |
| Mean SctO2 (%) | 1.209 | 0.861-1.740 | 0.287 |
| Median SctO2 (%) | 0.841 | 0.598-1.156 | 0.297 |
| Age (month) | 0.949 | 0.786-1.127 | 0.561 |
| Weight (kg) | 0.813 | 0.490-1.320 | 0.410 |
| Height (cm) | 1.064 | 0.918-1.247 | 0.428 |
| PELD score | 1.005 | 0.929-1.084 | 0.898 |
| Lac（mmol/L） | 0.955 | 0.563-1.696 | 0.866 |
| TB (µmol/L) | 1.003 | 0.997-1.010 | 0.281 |
| RBC (ml) | 1.006 | 1.001-1.012 | 0.019 |

*P* value < 0.1 was considered significant.

PELD, pediatric end-stage liver disease, Lac, lactic acid, TB, total bilirubin,

RBC, red blood cell, OR, Odds Ratio, CI, Confidence Interval.

Table S13 Univariate analysis result of length of hospital stay

| Variables | Non-extent (*n* = 58) | Extent (*n* = 65) | *P* Value |
| --- | --- | --- | --- |
| Intraoperative parameter |  |  |  |
| Max SctO2 (%) | 72.03 (11.90) | 70.33 (13.54) | 0.465 |
| Min SctO2 (%) | 32.07 (11.39) | 29.93 (13.54) | 0.348 |
| Mean SctO2 (%) | 50.91 (12.44) | 48.20 (12.48) | 0.230 |
| Median SctO2 (%) | 51.16 (12.92) | 47.90 (12.41) | 0.157 |
| AUC | 2104.75 [848.50, 4104.50] | 2259.00 [1070.00, 4612.00] | 0.570 |
| MAP (mmHg) | 51.64 (5.48) | 51.11 (6.45) | 0.626 |
| pH | 7.30 (0.05) | 7.30 (0.06) | 0.376 |
| Lac (mmol/L) | 3.09 (1.04) | 3.01 (1.04) | 0.690 |
| Cold ischemia time (min) | 66.40 (18.39) | 66.20 (21.08) | 0.956 |
| RBC (ml) | 200.00 (145.70) | 206.15 (128.35) | 0.804 |
| Preoperative parameter |  |  |  |
| Male (%) | 22 (37.9%) | 29 (44.6%) | 0.772 |
| Age (month) | 8.43 (5.83) | 7.62 (5.12) | 0.411 |
| Height (cm) | 68.02 (6.40) | 66.91 (7.06) | 0.365 |
| Weight (kg) | 7.48 (1.65) | 7.34 (1.95) | 0.669 |
| PELD score | 14.19 [6.40, 21.01] | 12.24 [8.34, 17.56] | 0.253 |
| Postoperative parameter |  |  |  |
| Albumin (g/L) | 32.78 (4.02) | 33.10 (4.39) | 0.676 |
| ALT (U/L) | 395.00 [269.00, 562.50] | 411.00 [301.00, 619.00] | 0.576 |
| TB (µmol/L) | 214.90 [121.62, 298.60] | 217.60 [106.30, 270.10] | 0.478 |
| Hb (g/L) | 75.84 (10.52) | 71.94 (11.50) | 0.053 |
| PLT (109/L) | 162.07 (84.74) | 138.37 (70.21) | 0.093 |

The data are presented as the mean (standard deviation), median [interquartile range] and number (percentage).

*P* value < 0.1 was considered significant.

AUC, area under curve, MAP, mean arterial pressure, pH, potential of hydrogen, Lac, lactic acid, RBC, red blood cell, PELD, pediatric end-stage liver disease, ALT, alanine aminotransferase, TB, total bilirubin, Hb, hemoglobin, PLT, platelet.

Table S14 Multivariate logistic analysis result of length of hospital stay

| Variables | OR | 95% CI | *P* value |
| --- | --- | --- | --- |
| Hb (g/L) | 0.970 | 0.935-1.004 | 0.086 |
| PLT (109/L) | 0.997 | 0.992-1.002 | 0.226 |

*P* value < 0.1 was considered significant.

Hb, hemoglobin, PLT, platelet, OR, Odds Ratio, CI, Confidence Interval.
