# Supplementary material for: Association between cerebral tissue oxygen saturation and neurodevelopmental delay in patients undergoing pediatric liver transplantation
Source: Research Square preprint supplement (doi:10.21203/rs.3.rs-3569233/v1), 2023-11-10
Supplement: Supplementary file 9 [file c2ccb4a2b515d0d90ae21f47.docx]

Table S11 Univariate analysis result of ICU stay

| Variables | Non-extent (*n* = 61) | Extent (*n* = 62) | *P* Value |
| --- | --- | --- | --- |
| Intraoperative parameter |  |  |  |
| Max SctO2 (%) | 72.28 (12.72) | 70.00 (12.81) | 0.324 |
| Min SctO2 (%) | 33.80 (13.20) | 28.13 (11.34) | 0.012 |
| Mean SctO2 (%) | 51.88 (12.84) | 47.11 (11.74) | 0.033 |
| Median SctO2 (%) | 52.01 (12.89) | 46.90 (12.09) | 0.025 |
| AUC | 2660.50 [1060.00, 4612.00] | 1935.75 [778.75, 3760.88] | 0.284 |
| MAP (mmHg) | 51.00 (6.28) | 51.71 (5.74) | 0.514 |
| pH | 7.30 (0.05) | 7.30 (0.05) | 0.516 |
| Lac (mmol/L) | 2.86 (0.85) | 3.23 (1.17) | 0.047 |
| Cold ischemia time (min) | 64.43 (20.02) | 68.13 (19.52） | 0.306 |
| RBC (ml) | 162.62 (116.56) | 243.23 (143.18) | 0.001 |
| Preoperative parameter |  |  |  |
| Male (%) | 24 ( 39.3%) | 27 ( 43.5%) | 0.772 |
| Age (month) | 9.33 (6.59) | 6.69 (3.67) | 0.007 |
| Height (cm) | 68.95 (7.71) | 65.94 (5.31) | 0.013 |
| Weight (kg) | 7.85 (1.91) | 6.96 (1.60) | 0.006 |
| PELD score | 11.64 [0.61, 18.79] | 15.51 [10.67, 19.22] | 0.012 |
| Postoperative parameter |  |  |  |
| Albumin (g/L) | 33.25 (4.37) | 32.64 (4.05) | 0.425 |
| ALT (U/L) | 411.00 [277.00, 539.00] | 403.00 [266.75, 733.25] | 0.771 |
| TB (µmol/L) | 162.70 [67.10, 240.10] | 252.80 [155.38, 307.85] | <0.001 |
| Hb (g/L) | 74.54 (10.64) | 73.03 (11.72） | 0.456 |
| PLT (109/L) | 157.26 (80.01) | 141.95 (75.82） | 0.278 |

The data are presented as the mean (standard deviation), median [interquartile range] and number (percentage).

*P* value < 0.1 was considered significant.

AUC, area under curve, MAP, mean arterial pressure, pH, potential of hydrogen, Lac, lactic acid, RBC, red blood cell, PELD, pediatric end-stage liver disease, ALT, alanine aminotransferase, TB, total bilirubin, Hb, hemoglobin, PLT, platelet.
