# Supplementary material for: Association between cerebral tissue oxygen saturation and neurodevelopmental delay in patients undergoing pediatric liver transplantation
Source: Research Square preprint supplement (doi:10.21203/rs.3.rs-3569233/v1), 2023-11-10
Supplement: Supplementary file 10 [file e2c704660db8629d0ac86e79.docx]

Table S9 Univariate analysis result of developmental delay in social skill

| Variables | No delay (*n* = 118) | Delay (*n* = 5) | *P* Value |
| --- | --- | --- | --- |
| Intraoperative parameter |  |  |  |
| Max SctO2 (%) | 70.77 (12.78) | 79.70 (9.78) | 0.126 |
| Min SctO2 (%) | 30.79 (12.56) | 34.50 (13.58) | 0.520 |
| Mean SctO2 (%) | 49.04 (12.50) | 59.71 (6.67) | 0.061 |
| Median SctO2 (%) | 48.94 (12.69) | 61.00 (6.31) | 0.037 |
| AUC | 2200.25 [970.00, 4298.25] | 546.50 [410.00, 3355.50] | 0.458 |
| MAP (mmHg) | 51.29 (6.10) | 53.00 (2.00) | 0.534 |
| pH | 7.30 (0.05) | 7.33 (0.03) | 0.200 |
| Lac (mmol/L) | 3.08 (1.04) | 2.24 (0.61) | 0.076 |
| Cold ischemia time (min) | 66.38 (19.99) | 64.40 (15.27) | 0.828 |
| RBC (ml) | 200.00 (134.19) | 280.00 (178.89) | 0.200 |
| Preoperative parameter |  |  |  |
| Male (%) | 49 (41.5) | 2 (40.0) | 1.000 |
| Age (month) | 7.89 (5.31) | 10.60 (8.79) | 0.279 |
| Height (cm) | 67.38 (6.79) | 68.60 (6.50) | 0.694 |
| Weight (kg) | 7.42 (1.83) | 6.92 (1.38) | 0.544 |
| PELD score | 13.65 [8.25, 19.00] | 7.85 [4.82, 10.67] | 0.287 |
| Postoperative parameter |  |  |  |
| Albumin（g/L） | 32.91 (4.22) | 33.86 (4.16) | 0.621 |
| ALT（U/L） | 409.00 [276.25, 610.50] | 392.00 [164.00, 460.00] | 0.276 |
| TB（µmol/L） | 219.40 [107.72, 289.58] | 138.00 [121.20, 204.70] | 0.485 |
| Hb（g/L） | 73.75 (11.28) | 74.60 (9.29) | 0.868 |
| PLT (109/L) | 148.19 (76.81) | 181.40 (107.79) | 0.353 |
| Preoperative developmental delay |  |  |  |
| ASQ score abnormality (%) | 99 (83.9) | 4 ( 80.0) | 1.000 |
| Communication (%) | 56 (47.5) | 3 ( 60.0) | 0.926 |
| Gross motor (%) | 69 (58.5) | 4 ( 80.0) | 0.621 |
| Fine motor (%) | 33 (28.0) | 3 ( 60.0) | 0.298 |
| Problem-solving (%) | 33 (28.0) | 1 ( 20.0) | 1.000 |
| Social skill (%) | 62 (52.5) | 4 ( 80.0) | 0.454 |

The data are presented as the mean (standard deviation), median [interquartile range] and number (percentage).

*P* value < 0.1 was considered significant.

AUC, area under curve, MAP, mean arterial pressure, pH, potential of hydrogen, Lac, lactic acid, RBC, red blood cell, PELD, pediatric end-stage liver disease, ALT, alanine aminotransferase, TB, total bilirubin, Hb, hemoglobin, PLT, platelet, ASQ, ages stages questionnaires.
