# Supplementary material for: Association between cerebral tissue oxygen saturation and neurodevelopmental delay in patients undergoing pediatric liver transplantation
Source: Research Square preprint supplement (doi:10.21203/rs.3.rs-3569233/v1), 2023-11-10
Supplement: Supplementary file 11 [file e2dad72d480bf3d48aa7a218.docx]

Table S13 Univariate analysis result of length of hospital stay

| Variables | Non-extent (*n* = 58) | Extent (*n* = 65) | *P* Value |
| --- | --- | --- | --- |
| Intraoperative parameter |  |  |  |
| Max SctO2 (%) | 72.03 (11.90) | 70.33 (13.54) | 0.465 |
| Min SctO2 (%) | 32.07 (11.39) | 29.93 (13.54) | 0.348 |
| Mean SctO2 (%) | 50.91 (12.44) | 48.20 (12.48) | 0.230 |
| Median SctO2 (%) | 51.16 (12.92) | 47.90 (12.41) | 0.157 |
| AUC | 2104.75 [848.50, 4104.50] | 2259.00 [1070.00, 4612.00] | 0.570 |
| MAP (mmHg) | 51.64 (5.48) | 51.11 (6.45) | 0.626 |
| pH | 7.30 (0.05) | 7.30 (0.06) | 0.376 |
| Lac (mmol/L) | 3.09 (1.04) | 3.01 (1.04) | 0.690 |
| Cold ischemia time (min) | 66.40 (18.39) | 66.20 (21.08) | 0.956 |
| RBC (ml) | 200.00 (145.70) | 206.15 (128.35) | 0.804 |
| Preoperative parameter |  |  |  |
| Male (%) | 22 (37.9%) | 29 (44.6%) | 0.772 |
| Age (month) | 8.43 (5.83) | 7.62 (5.12) | 0.411 |
| Height (cm) | 68.02 (6.40) | 66.91 (7.06) | 0.365 |
| Weight (kg) | 7.48 (1.65) | 7.34 (1.95) | 0.669 |
| PELD score | 14.19 [6.40, 21.01] | 12.24 [8.34, 17.56] | 0.253 |
| Postoperative parameter |  |  |  |
| Albumin (g/L) | 32.78 (4.02) | 33.10 (4.39) | 0.676 |
| ALT (U/L) | 395.00 [269.00, 562.50] | 411.00 [301.00, 619.00] | 0.576 |
| TB (µmol/L) | 214.90 [121.62, 298.60] | 217.60 [106.30, 270.10] | 0.478 |
| Hb (g/L) | 75.84 (10.52) | 71.94 (11.50) | 0.053 |
| PLT (109/L) | 162.07 (84.74) | 138.37 (70.21) | 0.093 |

The data are presented as the mean (standard deviation), median [interquartile range] and number (percentage).

*P* value < 0.1 was considered significant.

AUC, area under curve, MAP, mean arterial pressure, pH, potential of hydrogen, Lac, lactic acid, RBC, red blood cell, PELD, pediatric end-stage liver disease, ALT, alanine aminotransferase, TB, total bilirubin, Hb, hemoglobin, PLT, platelet.
