# Supplementary material for: Association between cerebral tissue oxygen saturation and neurodevelopmental delay in patients undergoing pediatric liver transplantation
Source: Research Square preprint supplement (doi:10.21203/rs.3.rs-3569233/v1), 2023-11-10
Supplement: Supplementary file 12 [file e58df5dade1fd29e5a2541e9.docx]

Table S3 Univariate analysis result of developmental delay in gross motor

| Variables | No delay (*n* = 89) | Delay (*n* = 34) | *P* Value |
| --- | --- | --- | --- |
| Intraoperative parameter |  |  |  |
| Max SctO2 (%) | 72.50 (12.59) | 67.54 (12.70) | 0.054 |
| Min SctO2 (%) | 31.34 (12.77) | 29.90 (12.16) | 0.572 |
| Mean SctO2 (%) | 50.23 (12.65) | 47.51 (11.99) | 0.282 |
| Median SctO2 (%) | 50.18 (12.81) | 47.49 (12.41) | 0.295 |
| AUC | 2259.00 [833.00, 4520.50] | 2100.75 [1243.62, 3736.62] | 0.680 |
| MAP (mmHg) | 51.81 (5.84) | 50.18 (6.32) | 0.178 |
| PH | 7.31 (0.05) | 7.29 (0.06) | 0.069 |
| Lac (mmol/L) | 2.99 (1.06) | 3.19 (0.97) | 0.332 |
| Cold ischemia time (min) | 66.33 (19.53) | 66.21 (20.73) | 0.977 |
| RBC (ml) | 203.03 (145.46) | 203.82 (110.56) | 0.977 |
| Preoperative parameter |  |  |  |
| Male (%) | 35 (39.3) | 16 (47.1) | 0.566 |
| Age (month) | 8.74 (6.14) | 6.06 (2.10) | 0.014 |
| Height (cm) | 68.43 (7.30) | 64.82 (4.10) | 0.008 |
| Weight (kg) | 7.76 (1.92) | 6.48 (1.01) | <0.001 |
| PELD score | 13.10 [7.10, 19.58] | 12.93 [8.07, 16.66] | 0.977 |
| Postoperative parameter |  |  |  |
| Albumin（g/L） | 32.67 (4.15) | 33.67 (4.31) | 0.236 |
| ALT（U/L） | 426.00 [277.00, 573.00] | 395.00 [253.25, 672.00] | 0.995 |
| TB（µmol/L） | 217.60 [90.80, 290.70] | 208.35 [132.10, 266.30] | 0.819 |
| Hb（g/L） | 74.11 (11.62) | 72.91 (10.03) | 0.596 |
| PLT (109/L) | 141.58 (67.91) | 170.38 (97.82) | 0.067 |
| Preoperative developmental delay |  |  |  |
| ASQ score abnormality (%) | 75 ( 84.3) | 28 (82.4) | 1.000 |
| Communication (%) | 41 ( 46.1) | 18 (52.9) | 0.631 |
| Gross motor (%) | 51 ( 57.3) | 22 (64.7) | 0.588 |
| Fine motor (%) | 29 ( 32.6) | 7 (20.6) | 0.277 |
| Problem-solving (%) | 22 ( 24.7) | 12 (35.3) | 0.343 |
| Social skill (%) | 48 ( 53.9) | 18 (52.9) | 1.000 |

The data are presented as the mean (standard deviation), median [interquartile range] and number (percentage).

*P* value < 0.1 was considered significant.

AUC, area under curve, MAP, mean arterial pressure, pH, potential of hydrogen, Lac, lactic acid, RBC, red blood cell, PELD, pediatric end-stage liver disease, ALT, alanine aminotransferase, TB, total bilirubin, Hb, hemoglobin, PLT, platelet, ASQ, ages stages questionnaires.
