# Supplementary material for: Association between cerebral tissue oxygen saturation and neurodevelopmental delay in patients undergoing pediatric liver transplantation
Source: Research Square preprint supplement (doi:10.21203/rs.3.rs-3569233/v1), 2023-11-10
Supplement: Supplementary file 13 [file eb19f36f7f948aa2edc16ddf.docx]

Table S10 Multivariate logistic analysis result of developmental delay in social skill

| Variables | OR | 95% CI | *P* value |
| --- | --- | --- | --- |
| Mean SctO2 (%) | 0.624 | 0.298-1.097 | 0.141 |
| Median SctO2 (%) | 1.744 | 0.984-3.762 | 0.087 |
| Lac (mmol/L) | 0.260 | 0.028-1.192 | 0.145 |

*P* value < 0.1 was considered significant.

Lac, lactic acid, OR, Odds Ratio, CI, Confidence Interval
